# Supplementary material for: Longitudinal patient-reported outcomes one year after uniportal versus multiportal thoracoscopic surgery for lung cancer
Source: Research Square preprint supplement (doi:10.21203/rs.3.rs-7146106/v1), 2025-07-28
Supplement: Supplementary file 1 [file 8da914046755988d6ac628c4.docx]

| **Supplementary Table 2. Proportion of Severe Symptom and Functioning Score Between U-VATS and M-VATS Before Surgerya** | | | | | | |
| --- | --- | --- | --- | --- | --- | --- |
| **Variables** | **Unmatched cohort**  **(n = 1000)** | | | **1:2 Propensity score matching**  **(Caliper matching: n = 258)** | | |
| **U-VATS (n = 914)** | **M-VATS (n = 86)** | **P** | **U-VATS (n = 172)** | **M-VATS (n = 86)** | ***P*** |
| Pain | 0 (0.0) | 0 (0.0) | - | 0 (0.0) | 0 (0.0) | - |
| Cough | 4 (0.4) | 0 (0.0) | 0.999 | 1 (0.6) | 0 (0.0) | 0.999 |
| Shortness of breath | 2 (0.2) | 0 (0.0) | 0.999 | 0 (0.0) | 0 (0.0) | - |
| Disturbed sleep | 41 (4.5) | 2 (2.3) | 0.575 | 9 (5.2) | 2 (2.3) | 0.346 |
| Fatigue | 11 (1.2) | 0 (0.0) | 0.613 | 3 (1.7) | 0 (0.0) | 0.553 |
| Drowsiness | 6 (0.7) | 0 (0.0) | 0.999 | 2 (1.2) | 0 (0.0) | 0.554 |
| Distress | 19 (2.1) | 3 (3.5) | 0.427 | 3 (1.7) | 3 (3.5) | 0.404 |
| Activity limitation | 1 (0.1) | 0 (0.0) | 0.999 | 0 (0.0) | 0 (0.0) | - |
| Difficulty in walking | 1 (0.1) | 0 (0.0) | 0.999 | 0 (0.0) | 0 (0.0) | - |

Abbreviations: M-VATS, multiportal video-assisted thoracoscopic surgery; U-VATS, uniportal video-assisted thoracoscopic surgery.

aSevere score was defined as a score of ≥7 points for all items 0-10 scales.
