# Supplementary material for: Longitudinal patient-reported outcomes one year after uniportal versus multiportal thoracoscopic surgery for lung cancer
Source: Research Square preprint supplement (doi:10.21203/rs.3.rs-7146106/v1), 2025-07-28
Supplement: Supplementary file 2 [file d63032a8b045480a130d3911.docx]

**Supplementary Table 1. Data Availability**

| **Time points** | **No. of PSA-Lung** | | **Completion Rate（%）** |
| --- | --- | --- | --- |
| **Available** | **Required** |
| Pre-operation | 1000 | 1000 | 100.0 |
| Discharge day | 800 | 1000 | 80.0 |
| Discharge month 1 | 587 | 1000 | 58.7 |
| Discharge month 2 | 689 | 1000 | 68.9 |
| Discharge month 3 | 660 | 1000 | 66.0 |
| Discharge month 4 | 654 | 1000 | 65.4 |
| Discharge month 5 | 644 | 1000 | 64.4 |
| Discharge month 6 | 611 | 1000 | 61.1 |
| Discharge month 7 | 617 | 1000 | 61.7 |
| Discharge month 8 | 611 | 1000 | 61.1 |
| Discharge month 9 | 586 | 1000 | 58.6 |
| Discharge month 10 | 524 | 1000 | 52.4 |
| Discharge month 11 | 515 | 1000 | 51.5 |
| Discharge month 12 | 488 | 1000 | 48.8 |

Abbreviations: PSA-Lung, Perioperative Symptom Assessment for Lung Surgery.
